# Supplementary material
Source: Springer Nature journal article supplement (https://www.springermedizin.de/resource/supplementary/12865_2010_328_MOESM15_ESM.pdf/9427764)

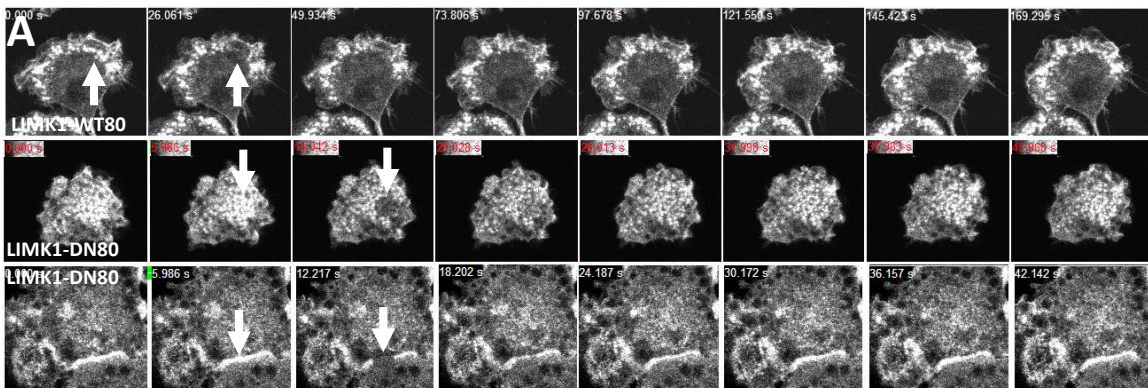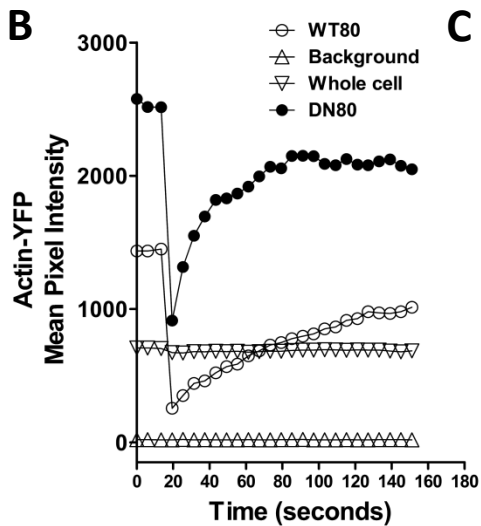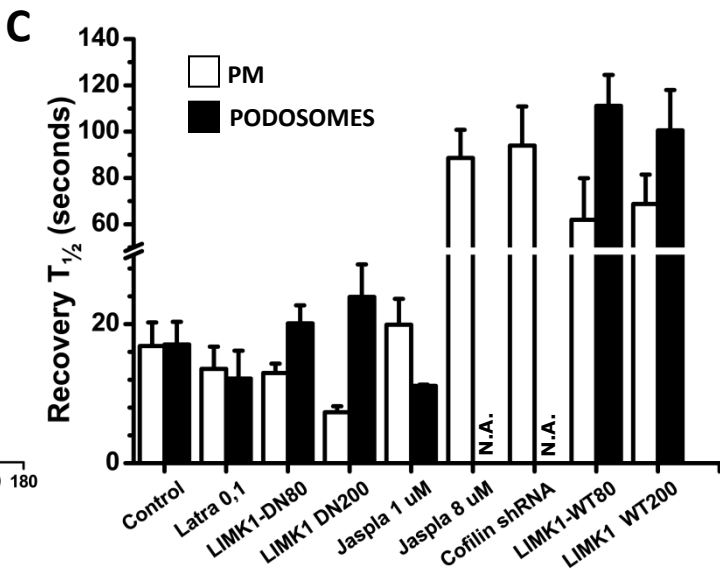

Supplement: MOESM15 [file 9427764]
